# Supplementary material
Source: publisher figshare collection journal article supplement (https://acs.figshare.com/ndownloader/files/4006312)
Supplement: Supplementary file 1 [file 4006312]

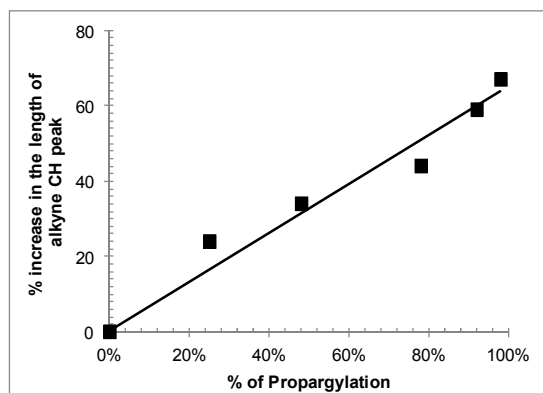

Figure S1

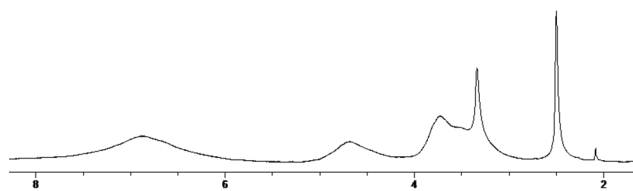

Figure S2

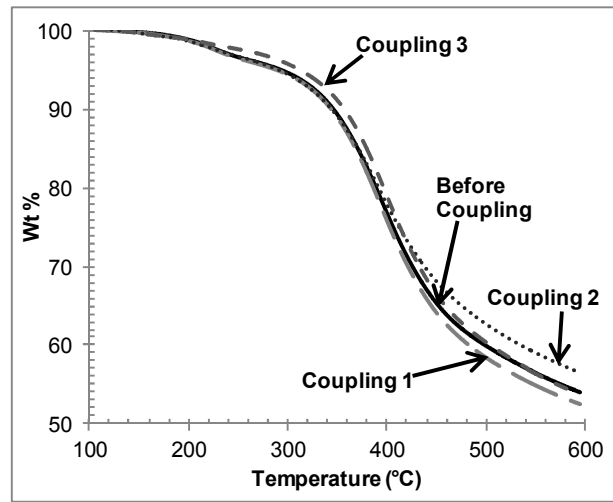

Figure S3

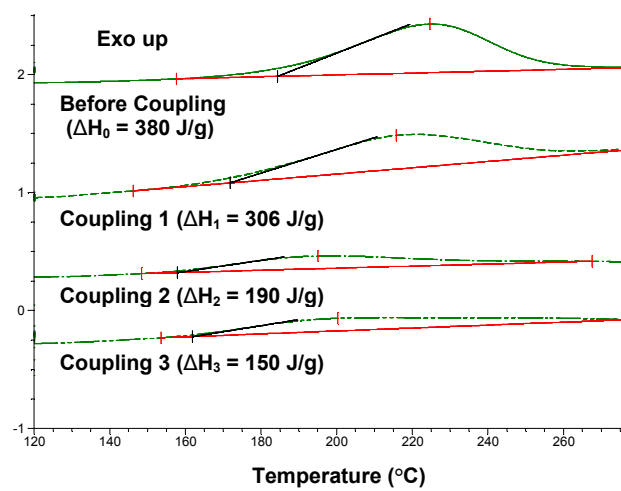

Figure S4

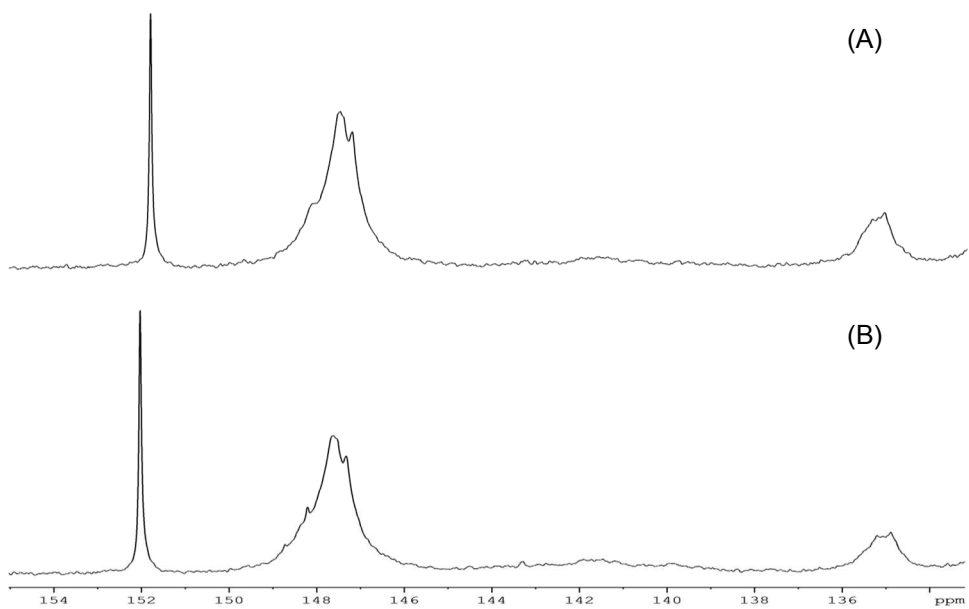

Figure S5

| Sample                                                                             | Aliphatic -OH<br>(mmo/g) | Phenolic -OH<br>(mmol/g) | Carboxylic -OH<br>(mmol/g) |
|------------------------------------------------------------------------------------|--------------------------|--------------------------|----------------------------|
| 25% methylated 75%<br>propargylated                                                | 6.40                     | 0.40                     | 1.80                       |
| 25% methylated 75%<br>propargylated<br>(after heating in bulk at<br>150 °C for 1h) | 5.90                     | 0.37                     | 1.30                       |

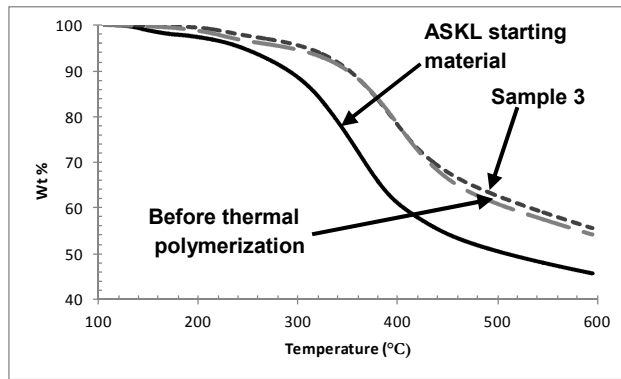

Figure S6

**Figure captions:**

**Figure S1.** Linear relation between the increases of intensity of the alkyne CH stretching peak with % of propargylation.

**Figure S2.**  $^1\text{H}$  NMR after the copper mediated coupling reaction

**Figure S3.** TGA traces of the polymer product after oxidative coupling reaction.

**Figure S4.** DSC traces of the polymer product after oxidative coupling reaction.

**Figure S5.** (A)  $^{31}\text{P}$  NMR spectrum of 25% methylated 75% propargylated ASKL. (B)  $^{31}\text{P}$  NMR spectrum of 25% methylated 75% propargylated ASKL after bulk thermal polymerization.

**Figure S6.** Thermal stability of the polymer formed after bulk thermal polymerization.
